# Supplementary material
Source: PubMed Central journal article supplement (PMC3690784)
Supplement: NIHMS445308-supplement-01.pdf [file NIHMS445308-supplement-01.pdf]

## Appendix E1 Codebook

### Appendix Codebook

The following text includes SAS commands to implement the analyses described in the Methods section of the manuscript. All covariates are defined at the end of this Appendix Codebook.

The predictor variable of interest is: iRgrp1. In the primary analysis, iRgrp1 is a binary indicator for 'High ED Crowding' on the day of admission, which is a facility normalized measure of daily diversion hours as described in the Methods. (Table 2) In a sensitivity analysis, iRgrp1 is a categorical variable for the number of diversion hours (0, 0-5,>5) on the day of admission. (Table 3)

#### 1. Module A: Logistic Mixed-Effects Regression for Inpatient Death

In the primary analysis (Table 2), the dependent variable INPT\_DTH is death anytime during the inpatient stay. In a sensitivity analysis, the dependent variable INPT\_DTH is death in the first three days of the inpatient stay. (Results section)

```
proc glimmix data=indata method=laplace noclprint;
  where sex in ("1","2");
  class oshpd_id sex iRgrp1 pdccs white admtmth_num_R ;
  model INPT_DTH(event='1')=age5yr sex white iRgrp1 admtmth_num_R weekend
  chf valve pulmcirc perivasc para neuro chrnlung dm dmcx hypothy renlfail
  liver ulcer aids lymph mets tumor arth coag obese wghtloss lytes bldloss
  anemdef alcohol drug psych depress htn_c oshpd_id /dist=binary solution
  cl;
  random intercept /subject=pdccs;
  output out=Pred_death pred=pred resid=r;
  title2 "IntraH Modell - Facility FE + PDCCS RE - InptDeath";
run;
```

#### 2. Modules B and C: Linear Mixed-Effects Regression Model for LOS (Module B) and COST (Module C)

The dependent variable for Module B is loglos, which is a log transform of length-of-stay as described in the Methods.

The dependent variable for Module C is logcost, which is a log transform of cost as described in the Methods. The below SAS statement illustrates Module B; Module C substitutes logcost for loglos.

```
proc mixed data=indata covtest noclprint;
  where sex in ("1","2");
  class oshpd_id sex iRgrp1 pdccs white admtmth_num_R;
  model loglos = age5yr sex white iRgrp1 white admtmth_num_R weekend
  chf valve pulmcirc perivasc para neuro chrnlung dm dmcx hypothy renlfail
  liver ulcer aids lymph mets tumor arth coag obese wghtloss lytes bldloss
  anemdef alcohol drug psych depress htn_c oshpd_id
  /solution cl outp=pred_los residual vciry;
  random intercept /subject=pdccs type=un;
  title2 "IntraH Modell - Facility FE + PDCCS RE - log(LOS) or log(COST)";
run;
```

#### 3. Bootstrapping CI Module: Logistic Mixed-Effects Regression for Inpatient Death, LOS, Cost

The Methods section describes the approach to estimating attributable population impact of high ED crowding on the outcomes.

```
%macro bootCI(seedno,setno);
proc surveysselect data=Indata method=urs samprate=1 outhits
  seed=&seedno out=bootsample;
  strata oshpd_id iRgrp1;
run;
data extraDH;
  set bootsample;
  where sex in ("1","2") and iRgrp1=1;
  INPT_DTH=.; loglos=.; lcost1=.; iRgrp1=0; dummy=1;
```

```

run;
data indata_boot;
    set bootsample extraDH;
run;

Execute Module A;
Execute Module B;
Execute Module C;
%mend;

%macro runboot;
%do i=1 %to nsim;
    %let x=%eval(1000*(%eval(941+10*i)));
    %bootCI(&x,&i);
%end;
%mend;

%runboot;

```

---

### Covariate Definitions

Source of variables are explained in the Methods.

|               |                                                     |
|---------------|-----------------------------------------------------|
| age5yr        | age in 5 year intervals                             |
| sex           | gender                                              |
| white         | white race                                          |
| admtmth_num_R | month of admission                                  |
| weekend       | weekend admission                                   |
| chf           | comorbidity: congestive heart failure               |
| valve         | comorbidity: valvular disease                       |
| pulmcirc      | comorbidity: pulmonary circulation disorders        |
| perivasc      | comorbidity: peripheral vascular disease            |
| para          | comorbidity: paralysis                              |
| neuro         | comorbidity: neurological disorders                 |
| chnrlung      | comorbidity: chronic pulmonary disease              |
| dm            | comorbidity: diabetes without chronic complications |
| dmcx          | comorbidity: diabetes with chronic complications    |
| hypothy       | comorbidity: hypothyroidism                         |
| renlfail      | comorbidity: renal failure                          |
| liver         | comorbidity: liver disease                          |
| ulcer         | comorbidity: chronic peptic ulcer disease           |
| aids          | comorbidity: HIV and AIDS                           |
| lymph         | comorbidity: lymphoma                               |
| mets          | comorbidity: metastatic cancer                      |
| tumor         | comorbidity: solid tumor without metastasis         |
| arth          | comorbidity: rheumatoid arthritis                   |
| coag          | comorbidity: coagulation deficiency                 |
| obese         | comorbidity: obesity                                |
| wghtloss      | comorbidity: weight loss                            |
| lytes         | comorbidity: fluid and electrolyte disorders        |
| bldloss       | comorbidity: blood loss anemia                      |
| anemdef       | comorbidity: deficiency anemias                     |
| alcohol       | comorbidity: alcohol abuse                          |
| drug          | comorbidity: drug abuse                             |
| psych         | comorbidity: psychoses                              |
| depress       | comorbidity: depression                             |
| htn_c         | comorbidity: hypertension                           |
| oshpd_id      | unique hospital identifier                          |
| pdccs         | primary discharge CCS code                          |

**Table E1.** Characteristics of included and excluded hospitals.

| Variable                                                | Included    | Excluded    |
|---------------------------------------------------------|-------------|-------------|
| Number of hospitals (n)                                 | 187         | 97          |
| <b>Number of hospitals in county, No. (%)*</b>          |             |             |
| 1                                                       | 3 (15)      | 19 (49)     |
| 2                                                       | 2 (10)      | 7 (18)      |
| >2                                                      | 15 (75)     | 13 (33)     |
| <b>Hospital-level profile of ED visitors</b>            |             |             |
| Age, mean (SD), y <sup>†</sup>                          | 39.7 (5.4)  | 37.5 (7.6)  |
| Male, mean (SD), %                                      | 46.2 (3.3)  | 46.3 (3.1)  |
| Nonwhite, mean (SD), %*                                 | 53 (22.1)   | 43.5 (25.0) |
| Income in US \$1,000, mean (SD)*                        | 48.9 (11.7) | 44 (11.8)   |
| Insurance: Med-Cal+uninsured, mean (SD), % <sup>†</sup> | 39.6 (19.1) | 45 (19.4)   |
| Population density, mean log scale (SD)*                | 7.1 (1.3)   | 5.1 (1.5)   |
| <b>Hospital characteristics, No. (%)</b>                |             |             |
| Teaching status <sup>†</sup>                            | 19 (10.2)   | 3 (3.1)     |
| <b>Ownership, No. (%)*</b>                              |             |             |
| County                                                  | 13 (7.0)    | 4 (4.1)     |
| For profit                                              | 51 (27.3)   | 12 (12.4)   |
| Nonprofit                                               | 123 (65.8)  | 81 (83.5)   |
| Trauma center (%)                                       | 33 (17.7)   | 9 (9.5)     |

\**P*<.01.<sup>†</sup>*P*<.05.

**Table E2.** Admissions by hospital characteristics and ED crowding.

| Hospital Characteristic             | No. (%)               |                                  |                                                  |                                                    |
|-------------------------------------|-----------------------|----------------------------------|--------------------------------------------------|----------------------------------------------------|
|                                     | Facilities<br>(n=187) | Admissions, Total<br>(n=995,379) | Admissions, High ED Crowding<br>(n=197,325; 20%) | Admissions, Normal ED Crowding<br>(n=798,054; 80%) |
| <b>Ownership*</b>                   |                       |                                  |                                                  |                                                    |
| Not for profit                      | 123 (65.8)            | 741,302 (74.5)                   | 147,927 (75.0)                                   | 593,375 (74.4)                                     |
| For profit                          | 51 (27.3)             | 166,604 (16.7)                   | 30,405 (15.4)                                    | 136,199 (17.1)                                     |
| County                              | 13 (7.0)              | 87,473 (8.9)                     | 18,993 (9.6)                                     | 68,480 (8.6)                                       |
| Trauma center*                      | 33 (17.7)             | 277,918 (27.9)                   | 61,455 (31.1)                                    | 216,463 (27.1)                                     |
| Teaching*                           | 19 (10.2)             | 164,675 (16.5)                   | 36,716 (18.6)                                    | 127,955 (16.0)                                     |
| <b>Med-Surg hospital beds, No.*</b> |                       |                                  |                                                  |                                                    |
| <100                                | 49 (26.2)             | 121,365 (12.2)                   | 19,365 (9.8)                                     | 102,000 (12.8)                                     |
| 100–399                             | 134 (71.7)            | 826,712 (83.1)                   | 167,030 (84.7)                                   | 659,682 (82.7)                                     |
| ≥400                                | 4 (2.1)               | 47,302 (4.8)                     | 10,930 (5.5)                                     | 36,372 (4.6)                                       |

\*P&lt;.05.

**Table E3.** Full inpatient mortality model results.\*

| Variables                           | OR   | Inpatient Mortality,<br>N=995,358, |  |
|-------------------------------------|------|------------------------------------|--|
|                                     |      | 95% CI                             |  |
| High ED crowding                    | 1.05 | 1.02–1.08                          |  |
| <b>Covariates</b>                   |      |                                    |  |
| Age in 5 y                          | 1.15 | 1.14–1.15                          |  |
| Male                                | 1.04 | 1.01–1.06                          |  |
| Nonwhite                            | 0.95 | 0.92–0.98                          |  |
| <b>Calendar month (ref=January)</b> |      |                                    |  |
| February                            | 0.87 | 0.82–0.91                          |  |
| March                               | 0.84 | 0.80–0.89                          |  |
| April                               | 0.85 | 0.81–0.90                          |  |
| May                                 | 0.80 | 0.75–0.84                          |  |
| June                                | 0.82 | 0.77–0.86                          |  |
| July                                | 0.85 | 0.80–0.89                          |  |
| August                              | 0.83 | 0.78–0.88                          |  |
| September                           | 0.85 | 0.80–0.89                          |  |
| October                             | 0.92 | 0.87–0.97                          |  |
| November                            | 0.91 | 0.86–0.96                          |  |
| December                            | 0.98 | 0.93–1.03                          |  |
| Weekend (ref=weekday)               | 1.06 | 1.03–1.08                          |  |
| <b>Comorbidities</b>                |      |                                    |  |
| Congestive heart failure            | 1.56 | 1.52–1.61                          |  |
| Valvular disease                    | 0.99 | 0.95–1.04                          |  |
| Pulmonary circulation disorders     | 1.47 | 1.40–1.55                          |  |
| Peripheral vascular disease         | 1.23 | 1.18–1.28                          |  |
| Paralysis                           | 1.21 | 1.16–1.27                          |  |
| Neurologic disorders                | 1.44 | 1.39–1.49                          |  |
| Chronic pulmonary disease           | 1.13 | 1.10–1.16                          |  |
| Diabetes w/o chronic complications  | 0.98 | 0.96–1.01                          |  |
| Diabetes w/chronic complications    | 0.89 | 0.85–0.94                          |  |
| Hypothyroidism                      | 0.93 | 0.90–0.97                          |  |
| Renal failure                       | 1.57 | 1.53–1.62                          |  |
| Liver disease                       | 1.79 | 1.71–1.88                          |  |
| Chronic peptic ulcer disease        | 1.10 | 0.77–1.56                          |  |
| HIV and AIDS                        | 1.39 | 1.06–1.82                          |  |
| Lymphoma                            | 1.75 | 1.58–1.93                          |  |
| Metastatic cancer                   | 3.53 | 3.37–3.69                          |  |
| Solid tumor w/o metastasis          | 1.89 | 1.79–2.01                          |  |
| Rheumatoid arthritis                | 1.18 | 1.10–1.27                          |  |
| Coagulation deficiency              | 2.70 | 2.60–2.80                          |  |
| Obesity                             | 0.82 | 0.78–0.86                          |  |
| Weight loss                         | 1.62 | 1.55–1.68                          |  |
| Fluid and electrolyte disorders     | 2.04 | 1.99–2.09                          |  |
| Blood loss anemia                   | 0.97 | 0.90–1.05                          |  |
| Deficiency anemias                  | 0.80 | 0.78–0.83                          |  |
| Alcohol abuse                       | 1.12 | 1.06–1.18                          |  |
| Drug abuse                          | 0.99 | 0.92–1.06                          |  |
| Psychoses                           | 0.81 | 0.76–0.86                          |  |
| Depression                          | 0.78 | 0.75–0.82                          |  |
| Hypertension                        | 0.79 | 0.77–0.81                          |  |

\*Primary diagnosis included approximately 200 categories and was modeled as a random effect.

**Table E4.** Full length-of-stay model results.\*

| Variables                           | Ratio | Length of Stay,<br>N=995,358, |  |
|-------------------------------------|-------|-------------------------------|--|
|                                     |       | 95% CI                        |  |
| High ED crowding                    | 1.008 | 1.005–1.012                   |  |
| <b>Covariates</b>                   |       |                               |  |
| Age in 5 y                          | 1.01  | 1.009–1.010                   |  |
| Male                                | 0.995 | 0.992–0.998                   |  |
| Nonwhite                            | 1.01  | 1.007–1.014                   |  |
| <b>Calendar month (ref=January)</b> |       |                               |  |
| February                            | 0.838 | 0.832–0.844                   |  |
| March                               | 0.937 | 0.930–0.943                   |  |
| April                               | 0.94  | 0.933–0.946                   |  |
| May                                 | 0.964 | 0.958–0.971                   |  |
| June                                | 0.961 | 0.954–0.968                   |  |
| July                                | 0.966 | 0.959–0.972                   |  |
| August                              | 0.968 | 0.961–0.976                   |  |
| September                           | 0.961 | 0.955–0.968                   |  |
| October                             | 0.97  | 0.963–0.976                   |  |
| November                            | 0.975 | 0.968–0.982                   |  |
| December                            | 0.995 | 0.988–1.002                   |  |
| Weekend (ref=weekday)               | 1.004 | 1.001–1.07                    |  |
| <b>Comorbidities</b>                |       |                               |  |
| Congestive heart failure            | 1.196 | 1.190–1.202                   |  |
| Valvular disease                    | 0.118 | 1.111–1.126                   |  |
| Pulmonary circulation disorders     | 1.239 | 1.227–1.251                   |  |
| Peripheral vascular disease         | 1.094 | 1.087–1.101                   |  |
| Paralysis                           | 1.288 | 1.277–1.298                   |  |
| Neurologic disorders                | 1.185 | 1.179–1.192                   |  |
| Chronic pulmonary disease           | 1.135 | 1.130–1.140                   |  |
| Diabetes w/o chronic complications  | 1.055 | 1.051–1.060                   |  |
| Diabetes w/chronic complications    | 1.136 | 1.129–1.144                   |  |
| Hypothyroidism                      | 1.033 | 1.028–1.038                   |  |
| Renal failure                       | 1.054 | 1.049–1.059                   |  |
| Liver disease                       | 1.087 | 1.078–1.095                   |  |
| Chronic peptic ulcer disease        | 1.131 | 1.077–1.089                   |  |
| HIV and AIDS                        | 1.209 | 1.164–1.256                   |  |
| Lymphoma                            | 1.167 | 1.144–1.191                   |  |
| Metastatic cancer                   | 1.133 | 1.121–1.144                   |  |
| Solid tumor w/o metastasis          | 1.079 | 1.068–1.091                   |  |
| Rheumatoid arthritis                | 1.088 | 1.077–1.099                   |  |
| Coagulation deficiency              | 1.351 | 1.340–1.362                   |  |
| Obesity                             | 1.118 | 1.112–1.124                   |  |
| Weight loss                         | 1.55  | 1.537–1.563                   |  |
| Fluid and electrolyte disorders     | 1.29  | 1.285–1.295                   |  |
| Blood loss anemia                   | 1.367 | 1.350–1.384                   |  |
| Deficiency anemias                  | 1.253 | 1.249–1.258                   |  |
| Alcohol abuse                       | 1.111 | 1.103–1.119                   |  |
| Drug abuse                          | 1.063 | 1.055–1.071                   |  |
| Depression                          | 1.07  | 1.069–1.080                   |  |
| Hypertension                        | 1.06  | 1.057–1.064                   |  |

\*Primary diagnosis included approximately 200 categories and was modeled as a random effect.

**Table E5.** Full-cost model results.\*

| Variables                           | Costs, N=844,219 |             |
|-------------------------------------|------------------|-------------|
|                                     | Ratio            | 95% CI      |
| High ED crowding                    | 1.011            | 1.007–1.015 |
| <b>Covariates</b>                   |                  |             |
| Age in 5 y                          | 0.994            | 0.994–0.995 |
| Male                                | 1.037            | 1.033–1.040 |
| Nonwhite                            | 1.004            | 1.001–1.008 |
| <b>Calendar month (ref=January)</b> |                  |             |
| February                            | 0.903            | 0.897–0.910 |
| March                               | 0.999            | 0.992–1.007 |
| April                               | 1.001            | 0.994–1.009 |
| May                                 | 1.019            | 1.011–1.026 |
| June                                | 1.012            | 1.005–1.020 |
| July                                | 1.018            | 1.010–1.025 |
| August                              | 0.997            | 0.989–1.005 |
| September                           | 0.99             | 0.983–0.998 |
| October                             | 0.988            | 0.981–0.995 |
| November                            | 0.985            | 0.978–0.993 |
| December                            | 0.995            | 0.988–1.003 |
| Weekend (ref=weekday)               | 0.999            | 0.996–1.003 |
| <b>Comorbidities</b>                |                  |             |
| Congestive heart failure            | 1.24             | 1.233–1.247 |
| Valvular disease                    | 1.12             | 1.113–1.129 |
| Pulmonary circulation disorders     | 1.272            | 1.258–1.285 |
| Peripheral vascular disease         | 1.143            | 1.134–1.151 |
| Paralysis                           | 1.233            | 1.223–1.244 |
| Neurologic disorders                | 1.171            | 1.164–1.178 |
| Chronic pulmonary disease           | 1.161            | 1.156–1.167 |
| Diabetes w/o chronic complications  | 1.072            | 1.067–1.076 |
| Diabetes w/chronic complications    | 1.174            | 1.165–1.182 |
| Hypothyroidism                      | 1.029            | 1.023–1.034 |
| Renal failure                       | 1.065            | 1.059–1.071 |
| Liver disease                       | 1.089            | 1.080–1.099 |
| Chronic peptic ulcer disease        | 1.137            | 1.079–1.197 |
| HIV and AIDS                        | 1.221            | 1.174–1.269 |
| Lymphoma                            | 1.213            | 1.187–1.240 |
| Metastatic cancer                   | 1.134            | 1.122–1.147 |
| Solid tumor w/o metastasis          | 1.073            | 1.061–1.086 |
| Rheumatoid arthritis                | 1.086            | 1.074–1.097 |
| Coagulation deficiency              | 1.485            | 1.472–1.498 |
| Obesity                             | 1.146            | 1.139–1.152 |
| Weight loss                         | 1.546            | 1.532–1.560 |
| Fluid and electrolyte disorders     | 1.302            | 1.297–1.307 |
| Blood loss anemia                   | 1.43             | 1.411–1.449 |
| Deficiency anemias                  | 1.238            | 1.233–1.243 |
| Alcohol abuse                       | 1.107            | 1.099–1.115 |
| Drug abuse                          | 1.039            | 1.031–1.047 |
| Psychoses                           | 1.119            | 1.111–1.128 |
| Depression                          | 1.032            | 1.026–1.038 |
| Hypertension                        | 1.071            | 1.068–1.075 |

\*Primary diagnosis included approximately 200 categories and was modeled as a random effect.
